# Supplementary material for: Free volume dependence of the dielectric constant of poly(vinylidene fluoride) nanocomposite films
Source: Royal Society of Chemistry journal article supplement (doi:10.1039/d2ra04480c), 2022-01-01
Supplement: d2ra04480c1.pdf [file d2ra04480c1.pdf]

## Supplementary material

# Free Volume Dependence of Dielectric Constant of Poly(vinylidene fluoride) Nanocomposite Films

Lei Yang<sup>1,2</sup>, Xuyang Liu<sup>1</sup>, Zhouxun Lu<sup>1</sup>, Tong Song<sup>1</sup>, Zhihong Yang<sup>1</sup>, Jianmei Xu<sup>1</sup>, Wei Zhou<sup>1,2</sup>,  
a), Xingzhong Cao<sup>3</sup>, Runsheng Yu<sup>3</sup>, Qing Wang<sup>4</sup>

### AFFILIATIONS

<sup>1</sup>Faculty of Materials Science and Chemistry, China University of Geosciences, Wuhan 430078, China

<sup>2</sup>Zhejiang Institute, China University of Geosciences, Hangzhou 311305, China

<sup>3</sup>Institute of High Energy Physics, Chinese Academy of Sciences, Beijing 100049, China

<sup>4</sup>Department of Materials Science and Engineering, The Pennsylvania State University, University Park, PA 16802, USA

<sup>a</sup>Author to whom correspondence should be addressed: weizhou@cug.edu.cn

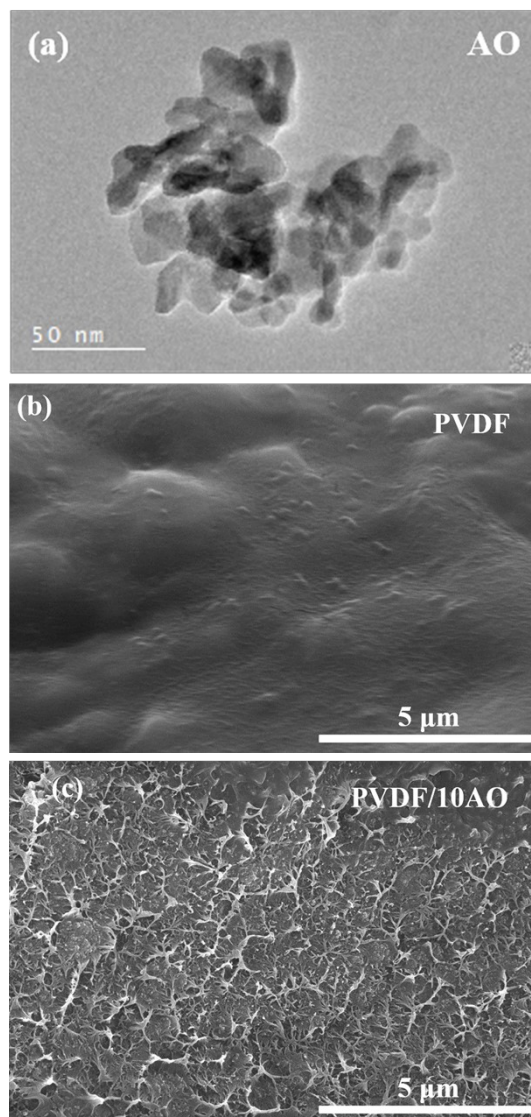

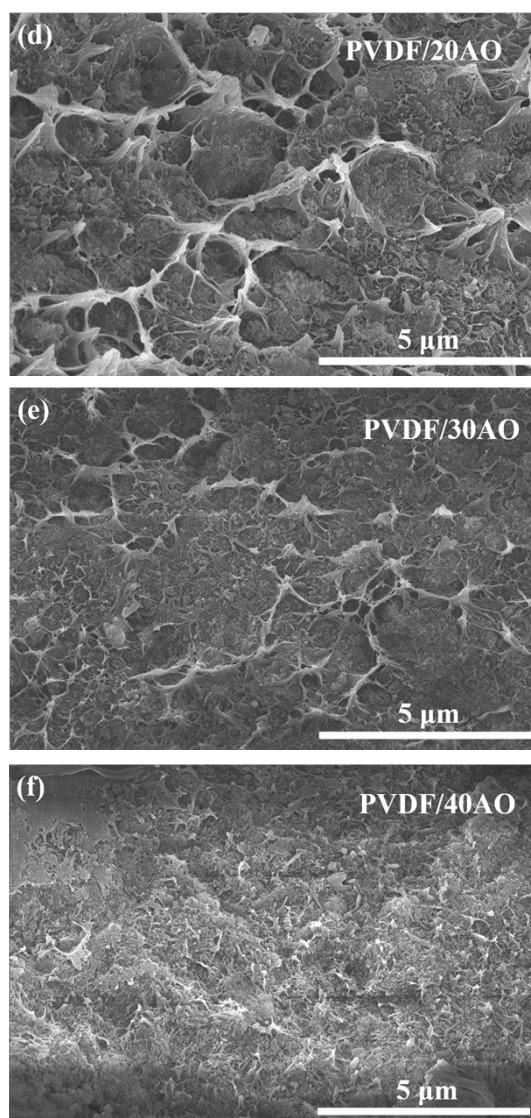

Figure S1. (a) TEM image of AO. SEM images of (b) pristine PVDF film, (c) PVDF/10AO composite film, (d) PVDF/20AO composite film, (e) PVDF/30AO composite film, (f) PVDF/40AO composite film.

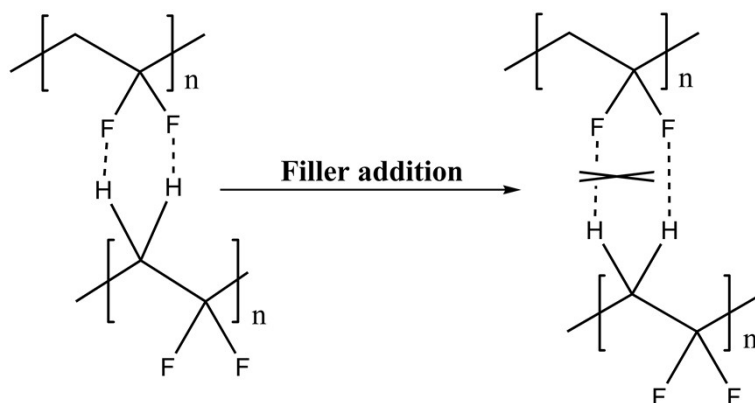

Figure S2. The diagram of weakening of intermolecular hydrogen bonding of PVDF composite film after filler addition. The scissor-shaped object in the right molecular formula indicates the weakening of intermolecular hydrogen bonding.
